# Supplementary material for: Development of a Low-Cost Artificial Vision System as an Alternative for the Automatic Classification of Persian Lemon: Prototype Test Simulation
Source: MDPI journal article supplement (doi:10.3390/foods12203829), 2023-10-19
Supplement: s1 [file s1]

Research Article

# Development of a low-cost artificial vision system as an alternative for the automatic classification of Persian lemon: Prototype test simulation.

Bridget V. Granados-Vega<sup>1</sup>, Carlos Maldonado-Flores<sup>2</sup>, Camila S. Gómez-Navarro<sup>1</sup>, Walter M. Warren-Vega<sup>1</sup>, Armando Campos-Rodríguez<sup>2,\*</sup>, Luis A. Romero-Cano<sup>1,\*</sup>

<sup>1</sup> Grupo de Investigación en Materiales y Fenómenos de Superficie. Departamento de Biotecnológicas y Ambientales. Universidad Autónoma de Guadalajara. Av. Patria 1201, C.P. 45129. Zapopan, Jalisco. México.

<sup>2</sup> Laboratorio de Innovación y Desarrollo de Procesos Industriales Sostenibles. Departamento de Biotecnológicas y Ambientales. Universidad Autónoma de Guadalajara. Av. Patria 1201, C. P. 45129. Zapopan, Jalisco. México

\* Correspondence: armando.crodriguez@edu.uag.mx (A.C.-R.), luis.cano@edu.uag.mx (L.A.R.-C.)

## SUPPLEMENTARY MATERIAL

**Citation:** To be added by editorial staff during production.

Academic Editor: Firstname Last-name

Received: date

Revised: date

Accepted: date

Published: date

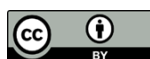

**Copyright:** © 2023 by the authors.

Submitted for possible open access publication under the terms and conditions of the Creative Commons Attribution (CC BY) license (<https://creativecommons.org/licenses/by/4.0/>).

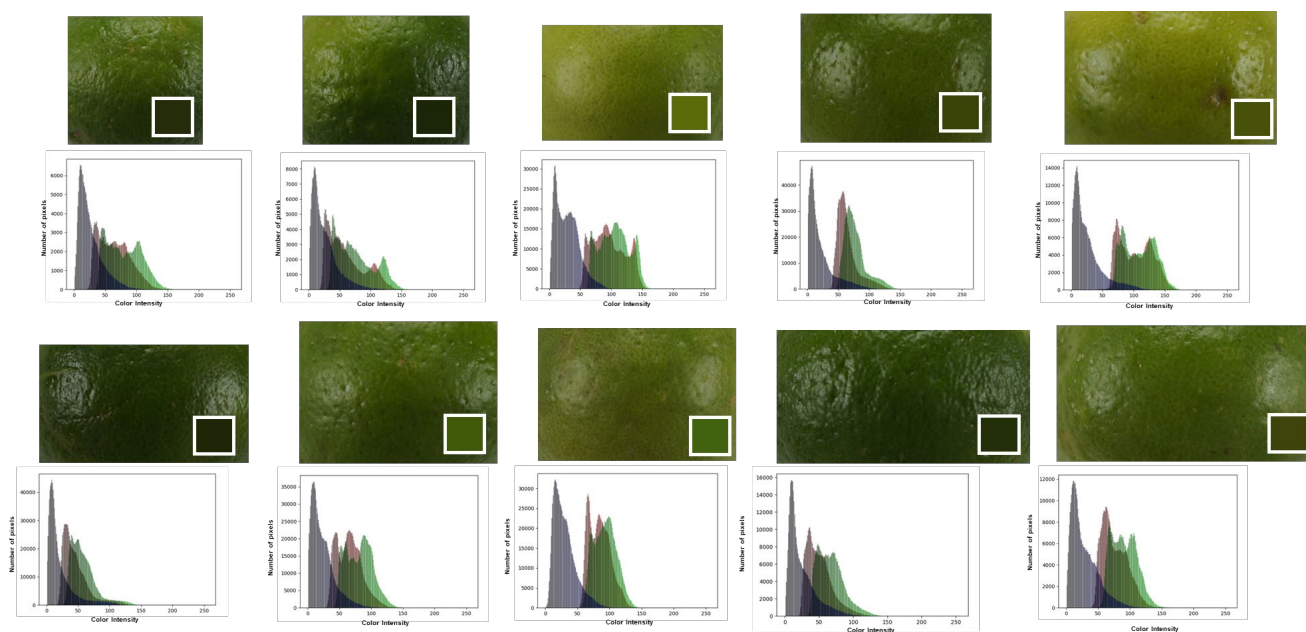

**Supplementary Figure S1.** Representative sample of 10 lemons analyzed for category “extra”. Note: The differences in the dimensions of the images correspond to the condition of analyzing at least 60% of the total area of the fruit.

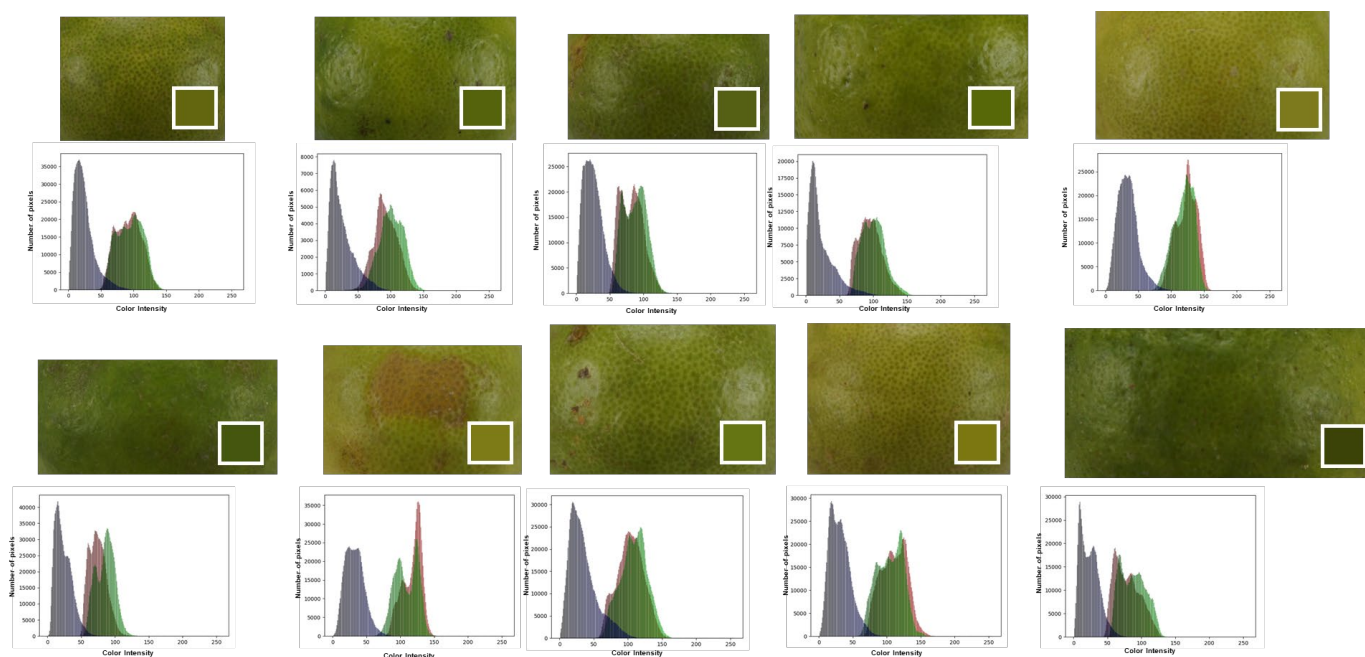

**Supplementary Figure S2.** Representative sample of 10 lemons analyzed for category I. Note: The differences in the dimensions of the images correspond to the condition of analyzing at least 60% of the total area of the fruit.

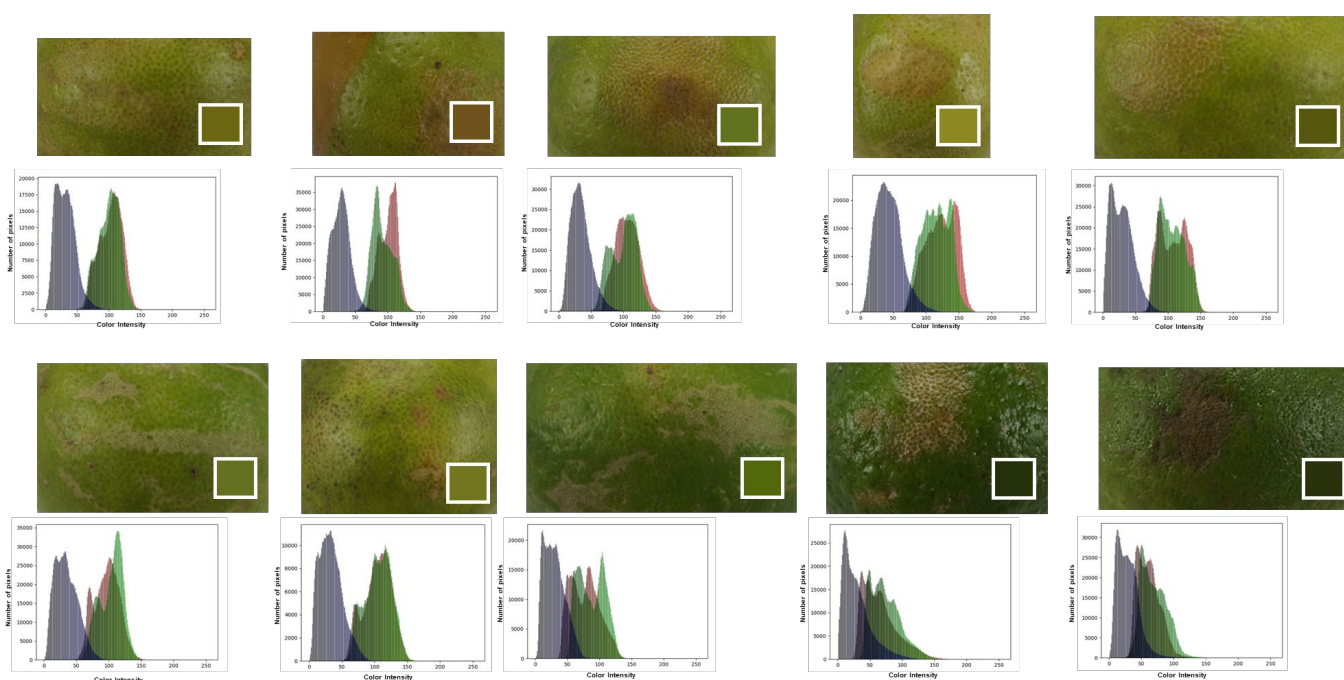

**Supplementary Figure S3.** Representative sample of 10 lemons analyzed for category II. Note: The differences in the dimensions of the images correspond to the condition of analyzing at least 60% of the total area of the fruit.

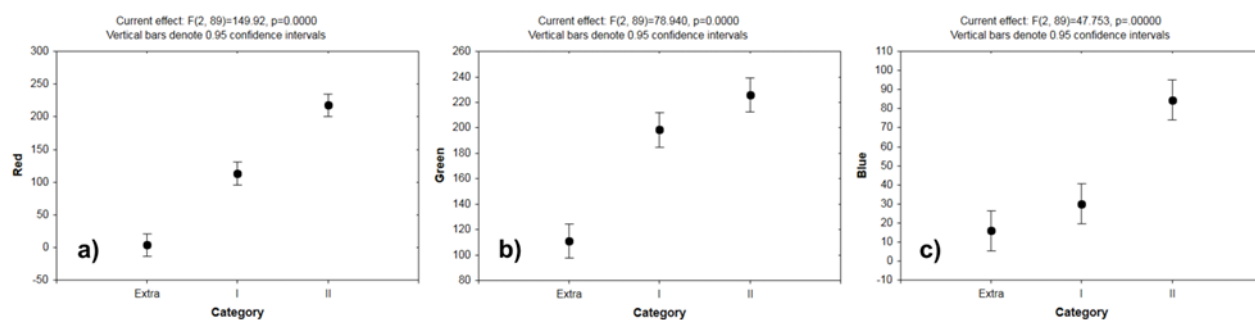

**Supplementary Figure S4.** Statistical analysis of the values of a) red, b) green, and c) blue in Persian lemons according to the category.

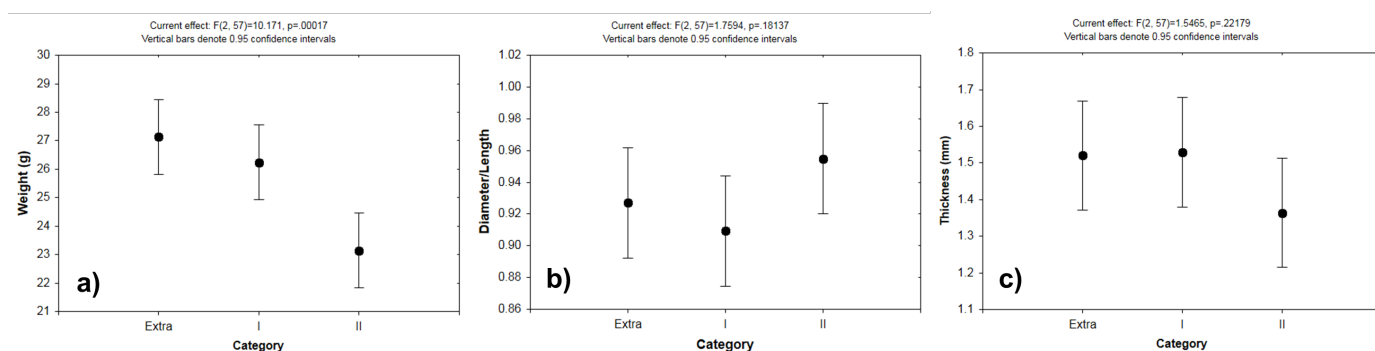

**Supplementary Figure S5.** Statistical analysis of the values of a) weight, b) diameter/length, and c) Thickness in Persian lemons according to the category.
